# Supplementary material
Source: publisher figshare collection journal article supplement (https://frontiersin.figshare.com/ndownloader/files/30421587)
Supplement: Supplementary file 1 [file 30421587]

Archive with 4 entries (4 files):
- Supplementary_Material_Jourdain_etal.docx
- __MACOSX/._Supplementary_Material_Jourdain_etal.docx
- Video_S4.mp4
- __MACOSX/._Video_S4.mp4
